Abstract citation ID: ofac492.133

**1667. The Accuracy of Hospital-Onset Bacteremia and Candidemia Metric Variants Across Hospitals**

Julia Lewis, DO<sup>1</sup>; Vanessa W. Stevens, PhD<sup>2</sup>; Brennan Ochoa, MD<sup>3</sup>; Colin Malone, PhD<sup>4</sup>; Makoto M. Jones, MD, MS<sup>3</sup>; <sup>1</sup>Salt Lake City VA Medical Center, Salt Lake City, Utah; <sup>2</sup>US Department of Veterans Affairs, Salt Lake City, Utah; <sup>3</sup>University of Utah, Denver, Colorado; <sup>4</sup>US Dept of Veterans Affairs, Salt Lake City, Utah

n/a

**Session:** 217. What's New With HAI Metrics

Saturday, October 22, 2022: 11:15 AM

**Background.** Hospital-onset bloodstream (HOB) infection metrics are automatable alternatives to metrics based on chart review and may have comparable accuracy. Our group explored and evaluated variants of these measures.

**Methods.** Multiple electronic rules for HOB infection were developed, ranging from simple to moderately complex (Table 1).

To assess diagnostic accuracy overall and its stability over time and between facilities, we gathered electronic health record data between October, 2015 and December, 2019. Acute care admissions where the first positive blood culture was greater than 3 days after admission were included. We block-randomized 10 facilities across regions (North Atlantic, Southeast, Midwest, Continental, and Pacific) and whether above and below the median number of operating acute care beds. We restricted analysis to facilities > 30 acute care beds. Four reviewers reviewed approximately 50 charts randomly selected from the 10 facilities, with 10 charts overlapping with 2 other reviewers. A 5th reviewer, adjudicated in the case of disagreement or uncertainty. Accuracy statistics were generated by comparing algorithm outputs to the adjudicated standard.

**Table 1. Definitions of candidate HOB rules**

| HOB Rule | All                                                                                                                                                                        | Specified Rule Parameters                                                                                                                                                                                                                                                                                    |
|----------|----------------------------------------------------------------------------------------------------------------------------------------------------------------------------|--------------------------------------------------------------------------------------------------------------------------------------------------------------------------------------------------------------------------------------------------------------------------------------------------------------|
| A        | a. No previous blood cultures with the same organism in the past 14 days                                                                                                   | A non-CSC, or a yeast, or a CSC isolated from 2 or more blood culture samples                                                                                                                                                                                                                                |
| B        | b. No antimicrobials administered before hospital day 3<br>c. First blood culture drawn after hospital day 3<br>d. First positive blood culture drawn after hospital day 3 | Either:<br>i. Non-CSC organism OR<br>ii. CSC x 1 AND<br>1. given antifungals/antibacterials for 4 or more antimicrobial days within a +/- 2-day window of the index positive culture date<br>2. OR given antimicrobials on the last day of admission<br>3. OR discharged (including by death) before day 4   |
| C        |                                                                                                                                                                            | Either:<br>i. given antifungals/antibacterials for 4 or more antimicrobial days within a +/- 2-day window of the index positive culture date<br>ii. OR given antimicrobials on the last day of admission<br>iii. OR discharged (including by death) before 4 days could pass                                 |
| D        |                                                                                                                                                                            | Either:<br>i. Non-CSC organism OR<br>ii. CSC x 1 AND<br>1. given antifungals/antibacterials for 4 or more qualifying antimicrobial days (new regimen) within a +/- 2-day window<br>2. OR given antimicrobials on the last day of admission<br>3. OR discharged (including by death) before 4 days could pass |
| E        |                                                                                                                                                                            | Either:<br>i. given antifungals/antibacterials for 4 or more qualifying antimicrobial days (new regimen) within a +/- 2-day window<br>ii. OR given antimicrobials on the last day of admission<br>iii. OR discharged (including by death) before 4 days could pass                                           |
| F        | a. No previous blood cultures with the same organism in the past 14 days<br>b. First positive blood culture drawn after hospital day 3                                     | All organisms, except common skin commensals                                                                                                                                                                                                                                                                 |

CSC: common skin commensals; HOB: hospital-onset bacteremia.

**Results.** Compared to the 140 chart standard, sensitivity was low for all algorithms investigated (Table 2), except where common skin commensals were excluded. Specificity dropped when antimicrobial-based criteria were used. Using definition F from Table 1 as representative of consistency of accuracy across facilities, the median facility sensitivity and specificity were 80.1% [IQR 72.1-95] and 85.4% [73.3-100], respectively.

**Table 2. Comparison of candidate HOB Rules (See Table 1) against manual chart review**

| Comparison of HOB Rule to Adjudicated Standard | % Sensitivity [95% CI] | % Specificity [95% CI] |
|------------------------------------------------|------------------------|------------------------|
| A                                              | 48.3 [37.4-59.2]       | 90.7 [79.7-96.9]       |
| B                                              | 50.6 [39.6-61.5]       | 63.0 [48.7-75.7]       |
| C                                              | 50.6 [39.6-61.5]       | 64.8 [50.6-77.3]       |
| D                                              | 50.6 [39.6-61.5]       | 63.0 [48.7-75.7]       |
| E                                              | 50.6 [39.6-61.5]       | 64.8 [50.6-77.3]       |
| F                                              | 79.3 [69.3-87.3]       | 77.8 [64.4-88.0]       |
| A (excluding CSC)                              | 52.8 [40.7-64.7]       | 87.0 [76.7-93.9]       |
| B (excluding CSC)                              | 52.8 [40.7-64.7]       | 62.3 [49.8-73.7]       |
| C (excluding CSC)                              | 52.8 [40.7-64.7]       | 63.8 [51.3-75.0]       |
| D (excluding CSC)                              | 52.8 [40.7-64.7]       | 62.3 [49.8-73.7]       |
| E (excluding CSC)                              | 52.8 [40.7-64.7]       | 63.8 [51.3-75.0]       |
| F (excluding CSC)                              | 95.8 [88.3-99.1]       | 82.6 [71.6-90.7]       |

**Conclusion.** HOB metrics may need to exclude common skin commensals for simplicity and accuracy. Addition of antimicrobial use criteria did not seem to improve accuracy. Although sample sizes were small, accuracy metrics appeared relatively stable across facilities.

**Disclosures.** All Authors: No reported disclosures.
